# Supplementary material for: Genome scaffolding and annotation for the pathogen vector Ixodes ricinus by ultra-long single molecule sequencing
Source: PubMed Central journal article supplement (PMC5299676; doi:10.1186/s13071-017-2008-9), 2017-02-08

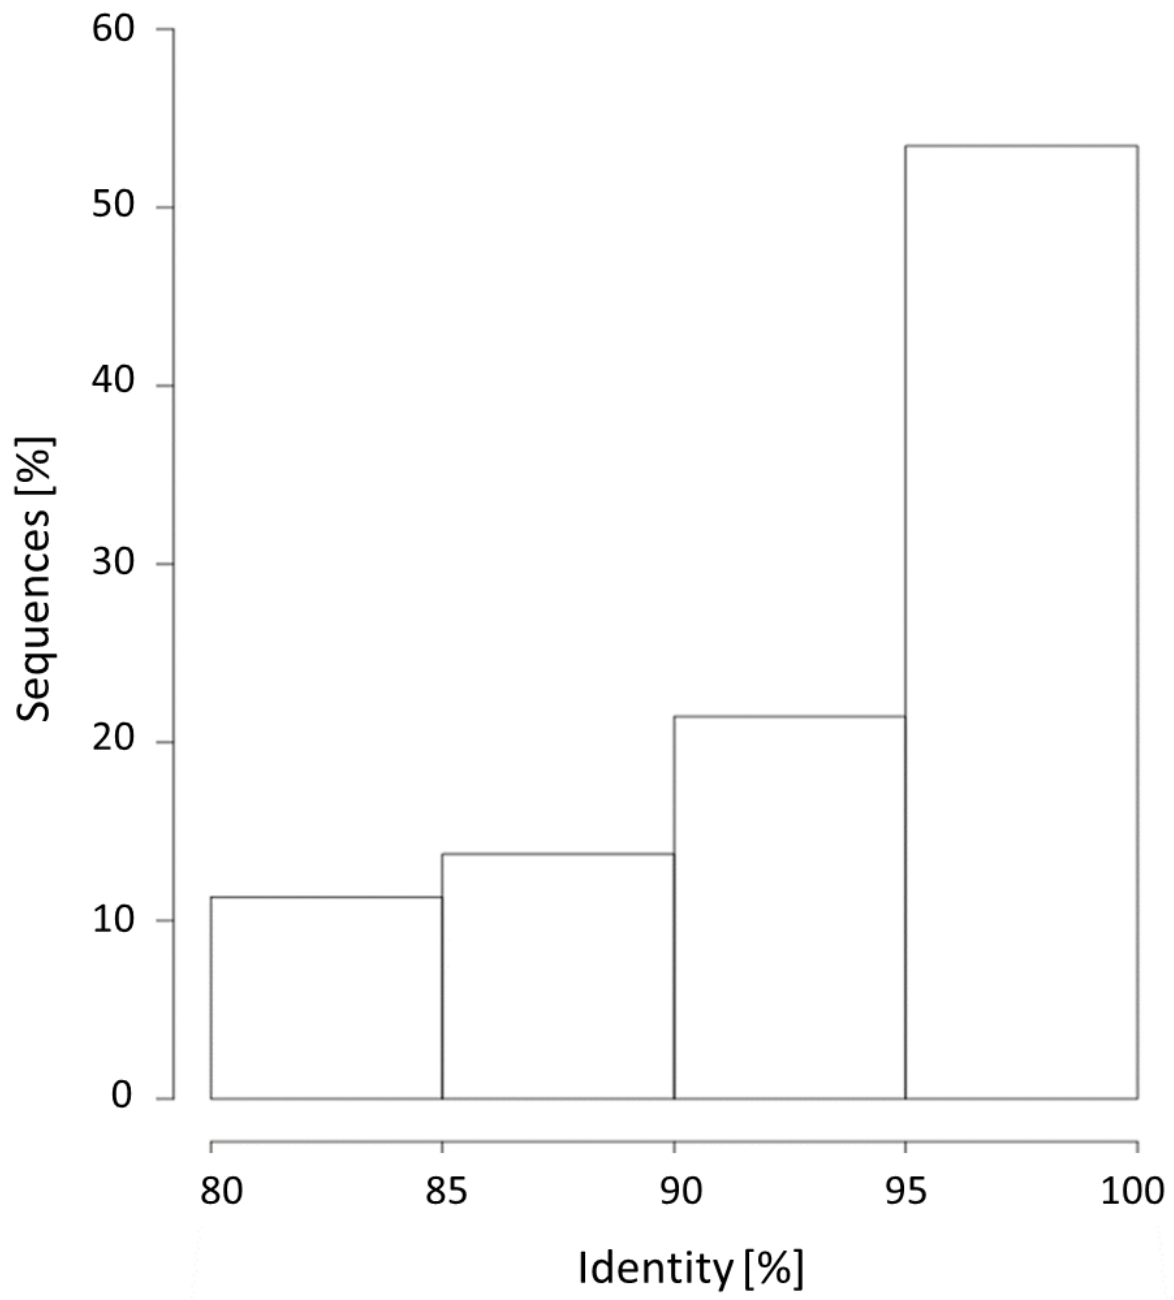

Supplement: 13071_2017_2008_MOESM2_ESM.pdf [file 13071_2017_2008_MOESM2_ESM.pdf]
